# Supplementary material for: Synthesis and Investigation of Anti-Inflammatory Activity of New Thiourea Derivatives of Naproxen
Source: MDPI journal article supplement (doi:10.3390/ph16050666), 2023-04-28
Supplement: s1 [file s1]

## Contents

### 1. NMR spectra of compounds 1-7.

|                                                                                   |   |
|-----------------------------------------------------------------------------------|---|
| <sup>1</sup> H NMR spectrum (a) and <sup>13</sup> C NMR (b) of compound 1 (MN16). | 3 |
| <sup>1</sup> H NMR spectrum (a) and <sup>13</sup> C NMR (b) of compound 2 (MN17). | 4 |
| <sup>1</sup> H NMR spectrum (a) and <sup>13</sup> C NMR (b) of compound 3 (MN18). | 5 |
| <sup>1</sup> H NMR spectrum (a) and <sup>13</sup> C NMR (b) of compound 4 (MN24). | 6 |
| <sup>1</sup> H NMR spectrum (a) and <sup>13</sup> C NMR (b) of compound 5 (MN26). | 7 |
| <sup>1</sup> H NMR spectrum (a) and <sup>13</sup> C NMR (b) of compound 6 (MN15). | 8 |
| <sup>1</sup> H NMR spectrum (a) and <sup>13</sup> C NMR (b) of compound 7 (MN30). | 9 |

a)

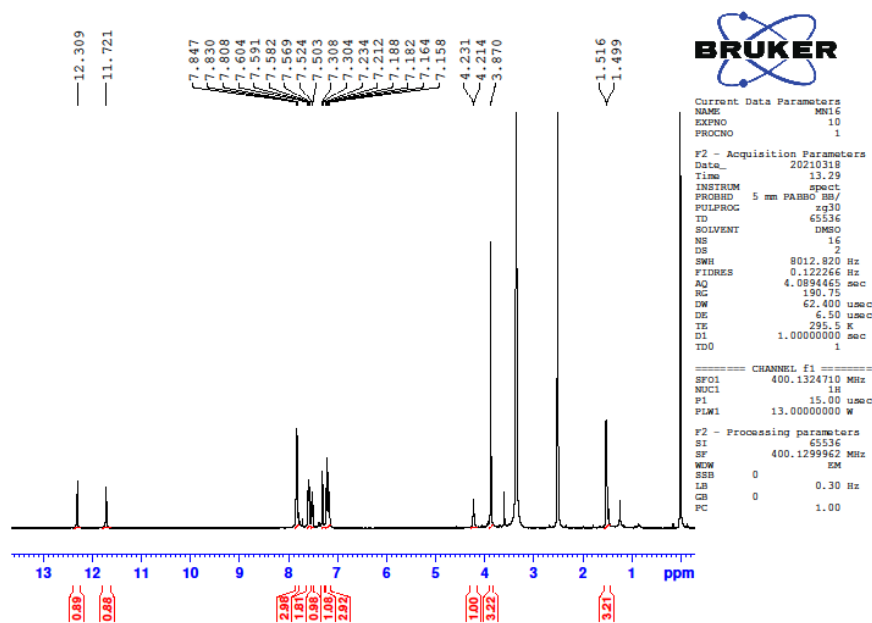

b)

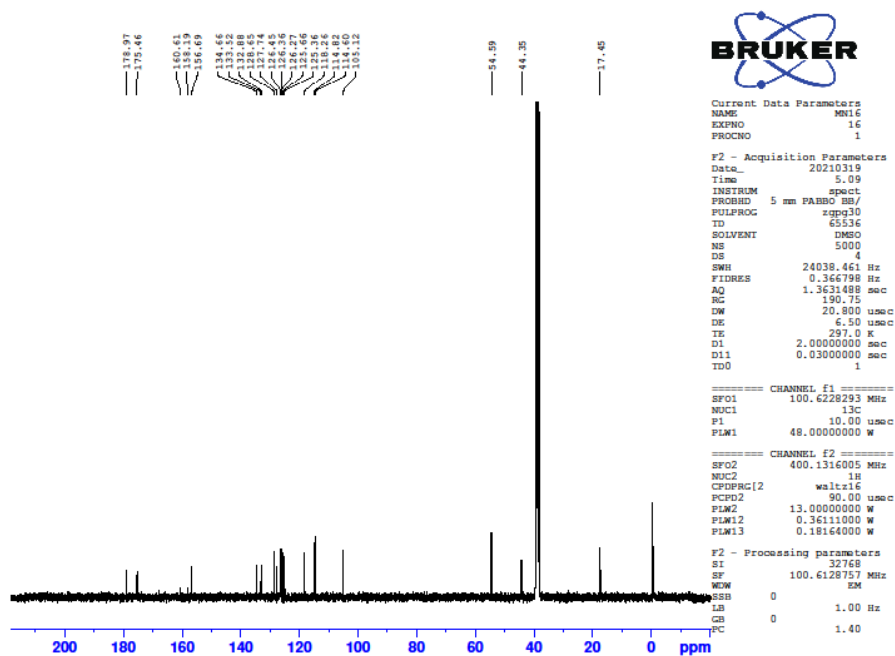

Figure S1.  $^1\text{H}$  NMR spectrum (a) and  $^{13}\text{C}$  NMR (b) of compound 1 (MN16).

a)

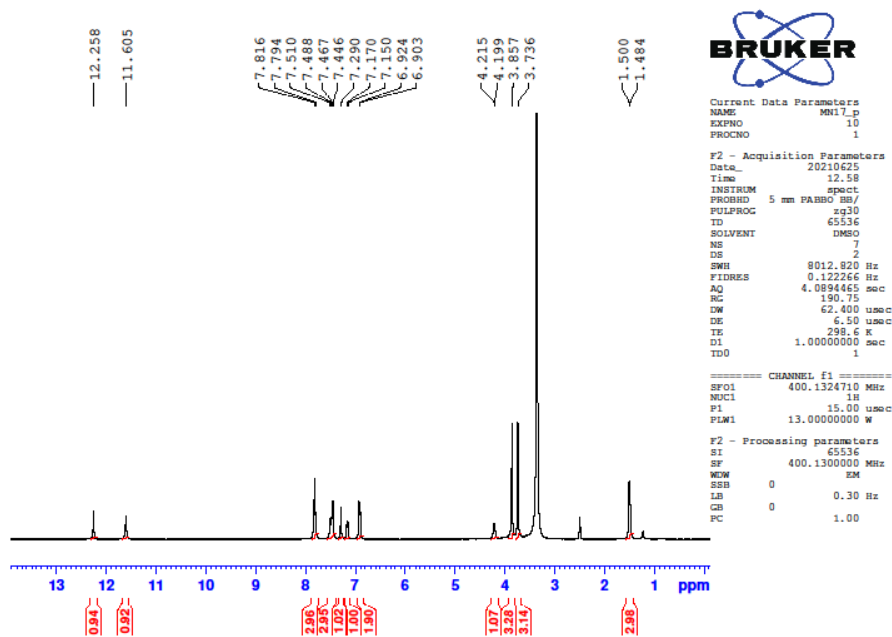

b)

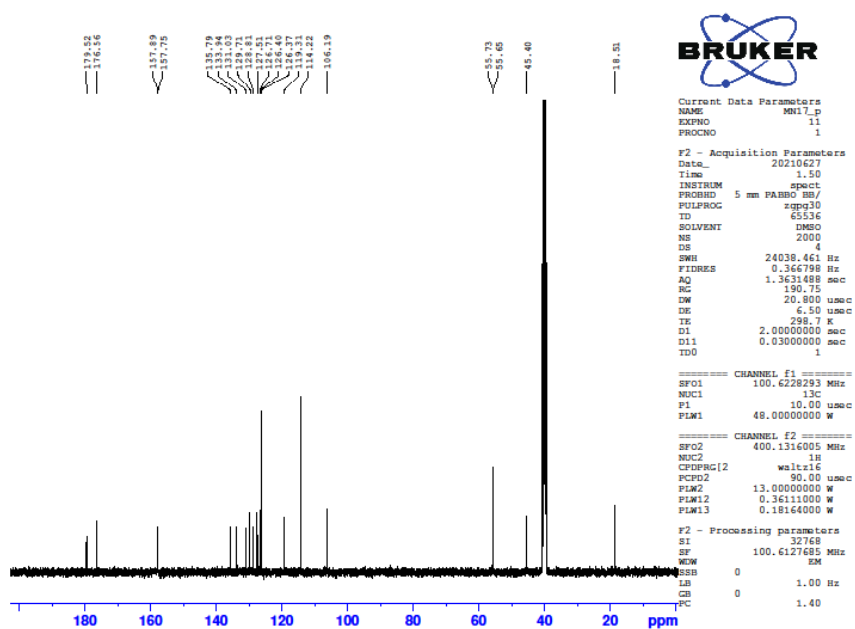

Figure S2. <sup>1</sup>H NMR spectrum (a) and <sup>13</sup>C NMR (b) of compound 2 (MN17).

a)

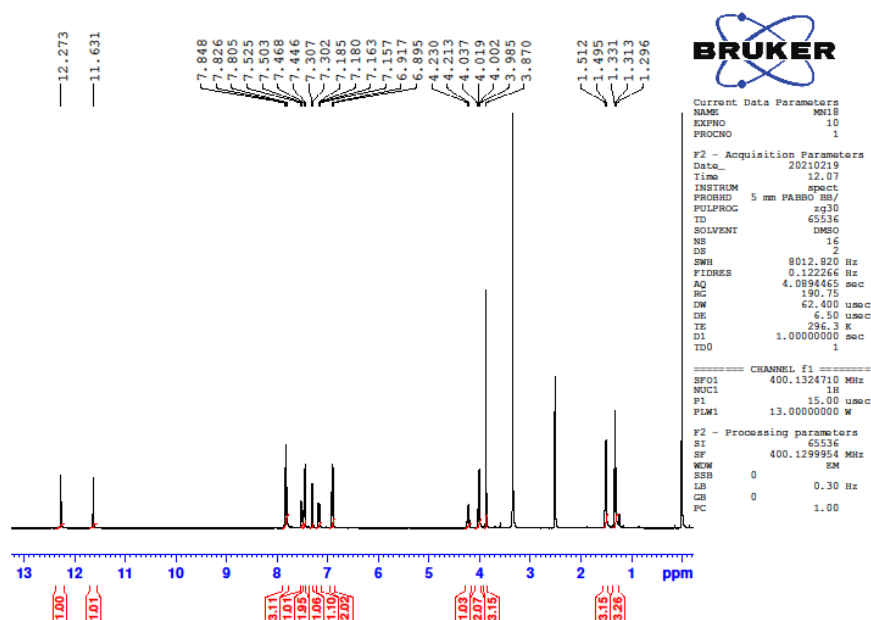

b)

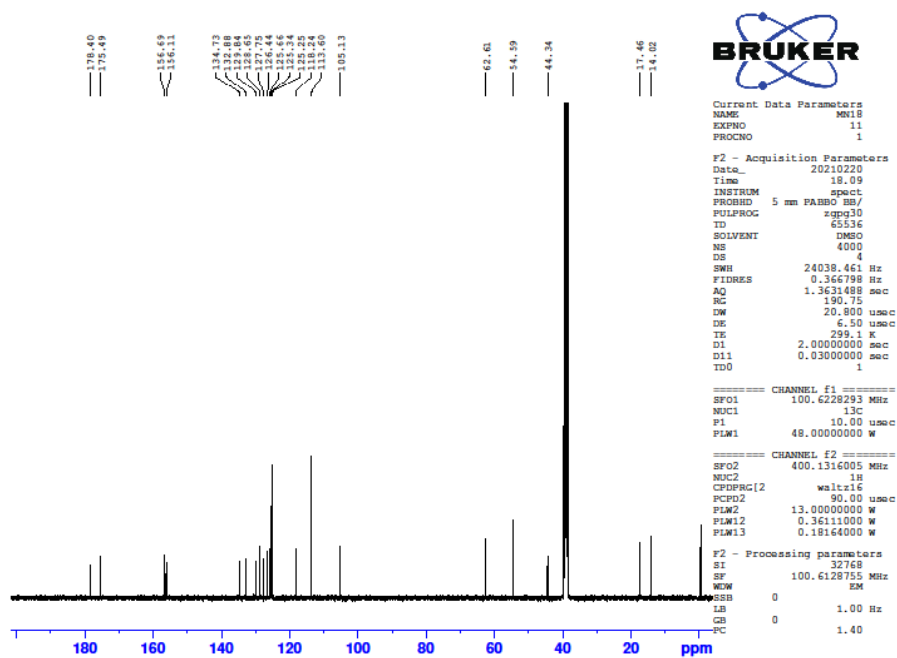

Figure S3.  $^1\text{H}$  NMR spectrum (a) and  $^{13}\text{C}$  NMR (b) of compound 3 (MN18).

a)

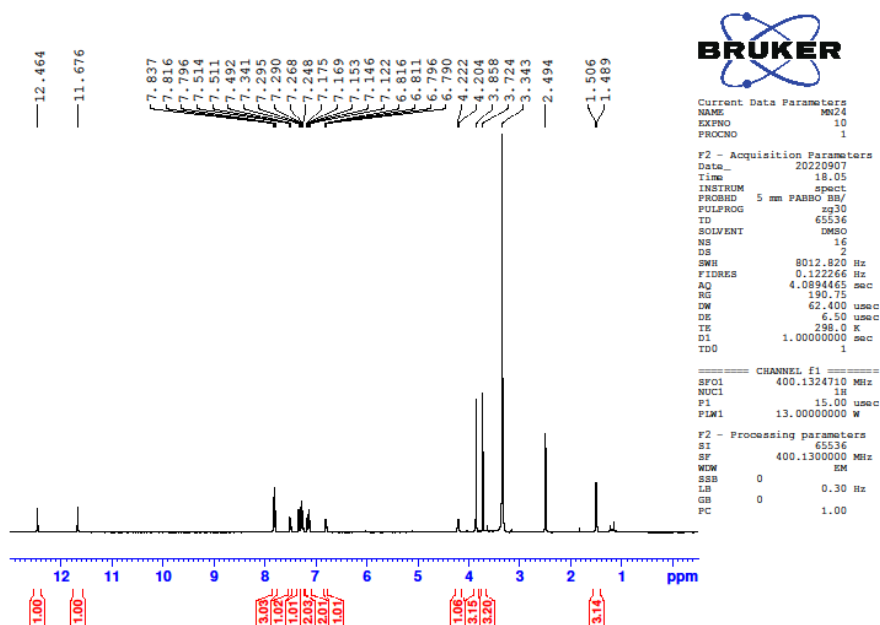

b)

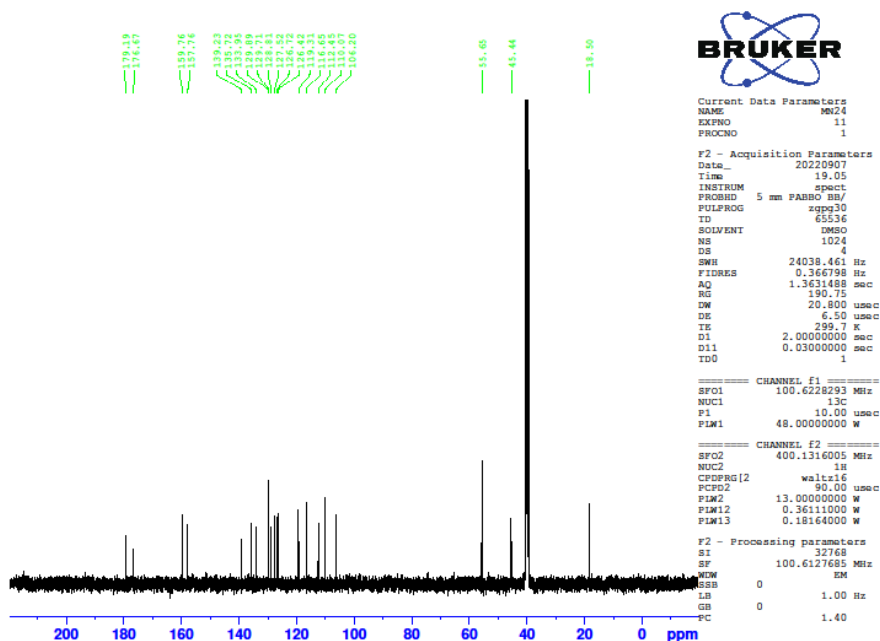

Figure S4.  $^1\text{H}$  NMR spectrum (a) and  $^{13}\text{C}$  NMR (b) of compound 4 (MN24).

a)

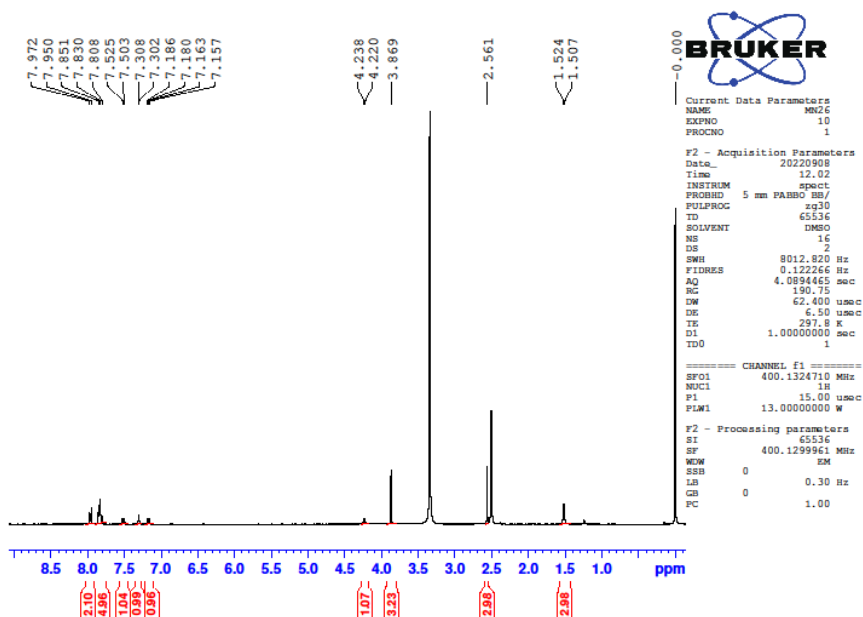

b)

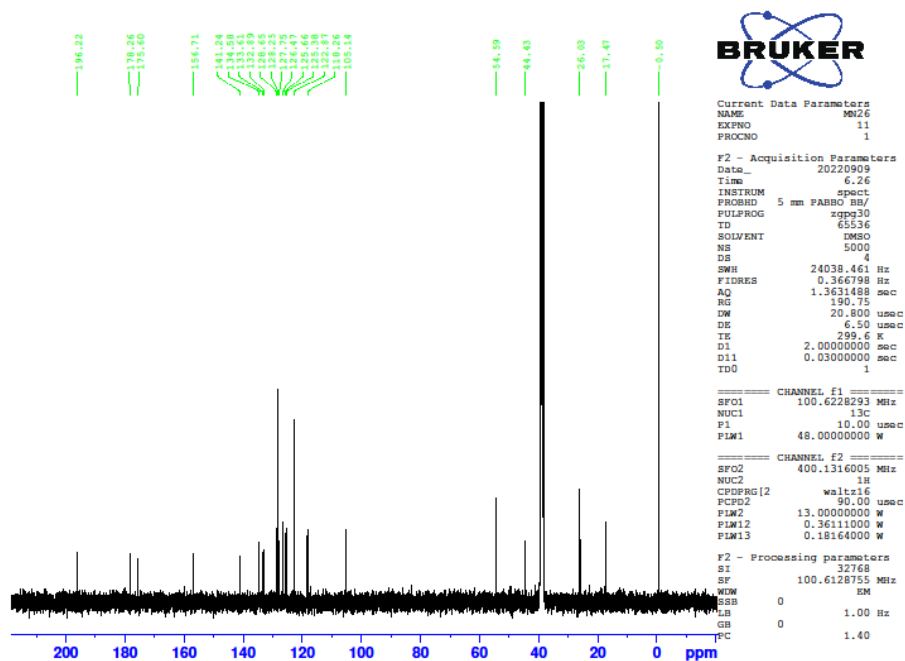

Figure S5.  $^1\text{H}$  NMR spectrum (a) and  $^{13}\text{C}$  NMR (b) of compound 5 (MN26).

a)

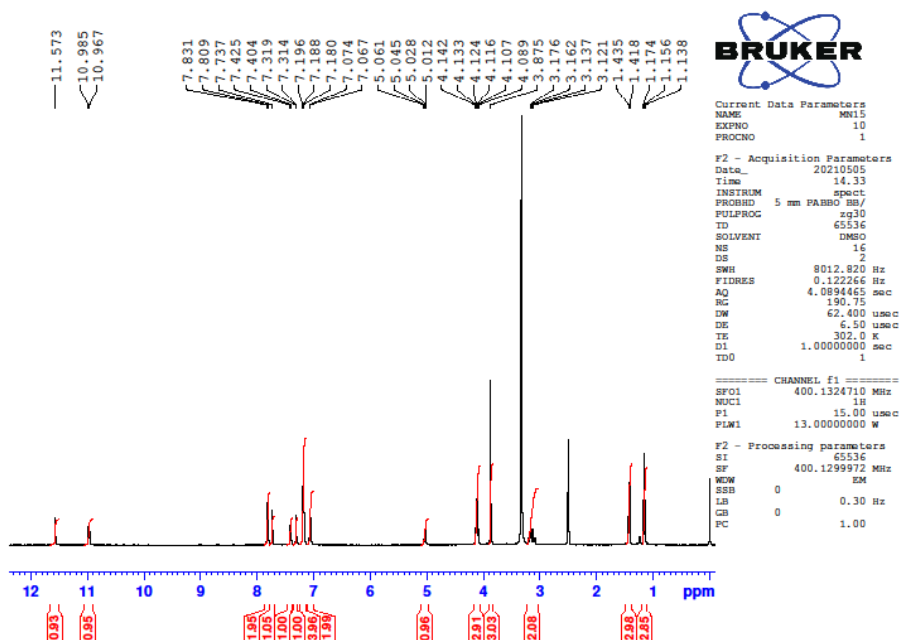

b)

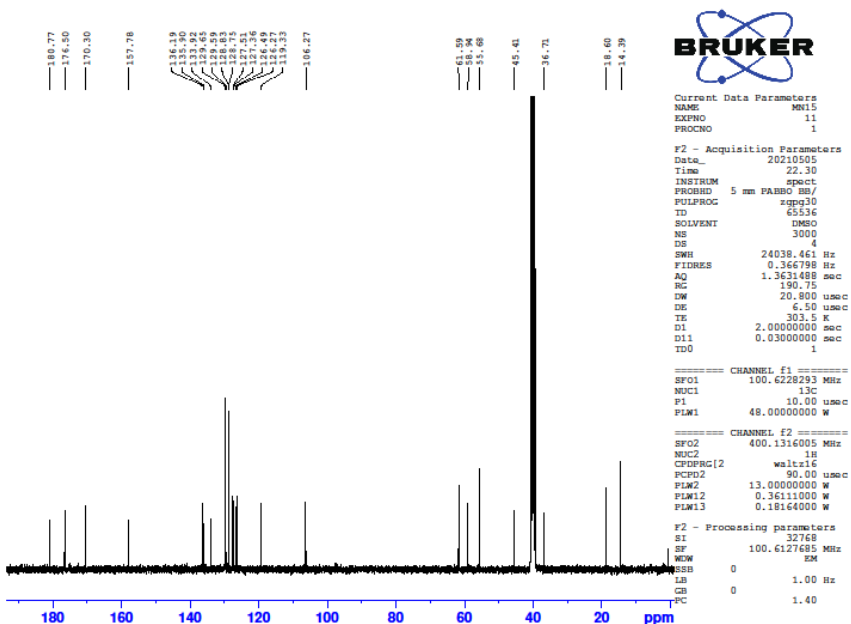

Figure S6.  $^1\text{H}$  NMR spectrum (a) and  $^{13}\text{C}$  NMR (b) of compound 6 (MN15).

a)

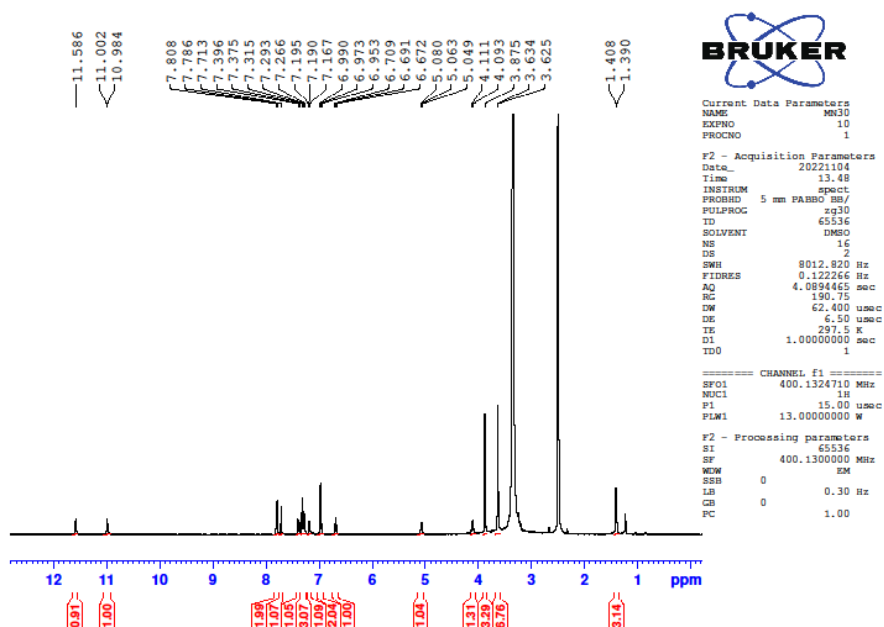

b)

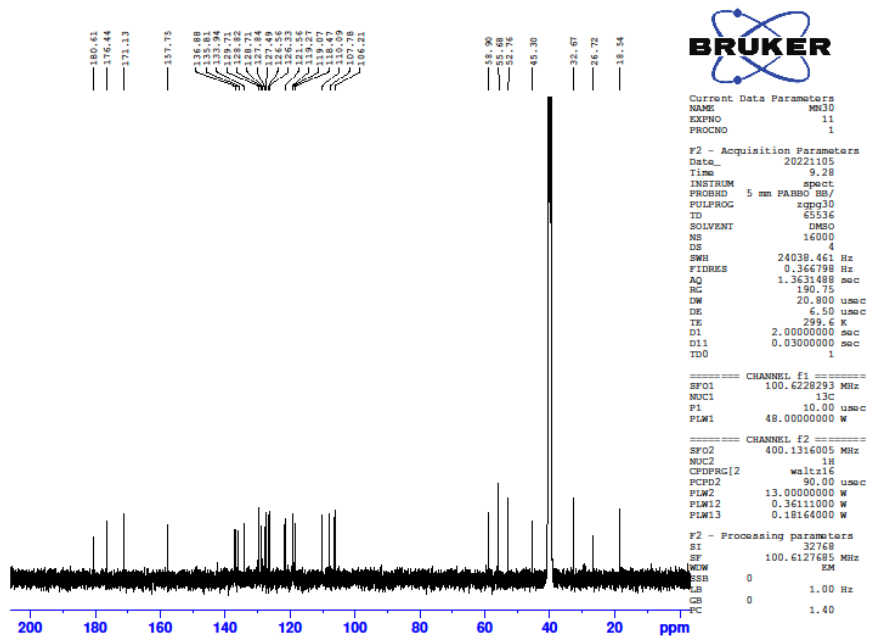

Figure S7.  $^1\text{H}$  NMR spectrum (a) and  $^{13}\text{C}$  NMR (b) of compound 7 (MN30).
